# Supplementary material
Source: PubMed Central journal article supplement (PMC3203239)

# Supplemental Data

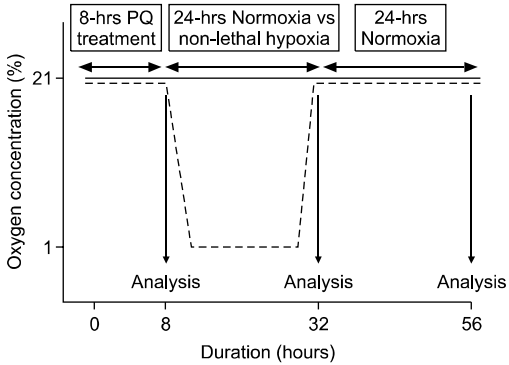

Figure S1. Schematic experimental design.

Supplement: emm-43-494-s001.pdf [file emm-43-494-s001.pdf]
